# Supplementary material for: A novel automatic method for the measurement of mercury vapour in ambient air, and comparison of uncertainty with established semi-automatic and manual methods
Source: Royal Society of Chemistry journal article supplement (doi:10.1039/c0ay00058b), 2010-01-01

**A novel automatic method for the measurement of mercury vapour  
in ambient air, and comparison of uncertainty with established semi-  
automatic and manual methods**

Andrew S. Brown<sup>\*,1</sup>, Richard J. C. Brown<sup>1</sup>, Matthew A. Dexter<sup>2</sup>, Warren T. Corns<sup>2</sup>  
and Peter B. Stockwell<sup>2</sup>.

<sup>1</sup> Analytical Science Division, National Physical Laboratory, Teddington, Middlesex,  
TW11 0LW, UK.

<sup>2</sup> PS Analytical, Arthur House, Crayfields Industrial Estate, Orpington, Kent, BR5  
3HP, UK

\* Corresponding author:

Andrew S. Brown, tel.: +44 20 8943 6831, fax: +44 20 8614 0448, e-mail address:

[andrew.brown@npl.co.uk](mailto:andrew.brown@npl.co.uk)

**Fig. A** Diagrammatic representation of the ‘bell-jar’ calibration vessel.

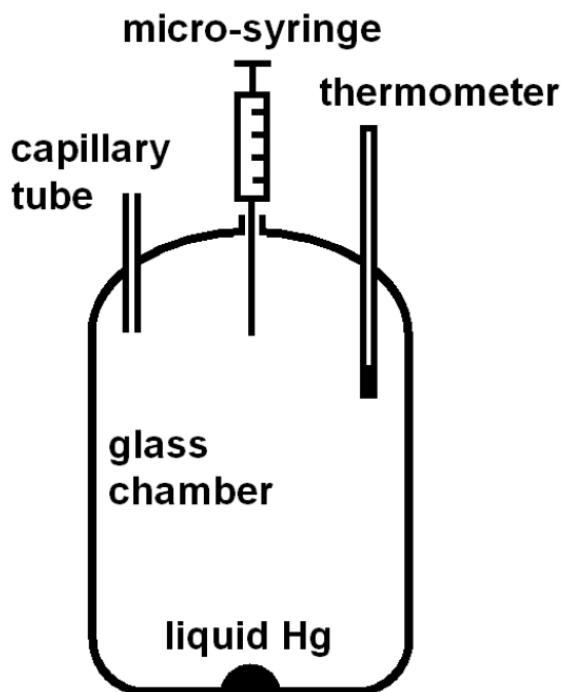

**Fig. B** Hierarchies of the input equations that form the full measurement equations.

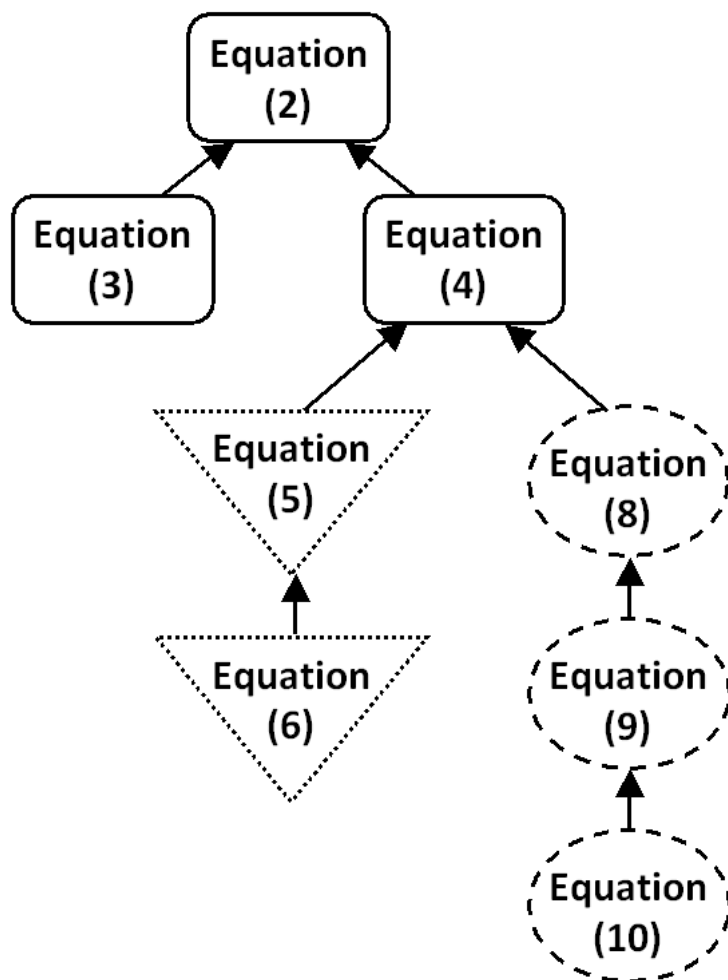

Supplement: c0ay00058b.pdf [file c0ay00058b.pdf]
